# Supplementary material
Source: publisher figshare collection journal article supplement (https://karger.figshare.com/ndownloader/files/23725934)
Supplement: Supplementary file 1 [file 23725934]

# Supplementary Material

In the present study, Mild Cognitive Impairment (PD-MCI) was evaluated along the Movement Disorder Society Task Force guidelines for the diagnosis of PD-MCI [1]; in our assessment, we applied Level II diagnostic criteria. Neuropsychological impairment was rated as positive if a patient scored below 1.5 standard deviations when compared to the normative data in at least two cognitive tests; represented by either two impaired tests in one out of five cognitive domains or one impaired test in two different cognitive domains. Additionally, for the MCI diagnosis a significant decline in cognition from premorbid level is required. In the present study, significant cognitive decline was rated as positive if either an informant indicated an IQCODE score >3.29 [2] and/or the patient reported cognitive changes in an interview. The definition of neuropsychological impairment was based on performance in five domains in the following cognitive tests:

1) Attention and Working Memory

- Stroop test, naming colors ([3]
- Trail Making Test, part A [4]
- Digit Span, backwards [5]

2) Executive functions

- Trail Making Test, ratio (part B/A: Reitan, 1958)
- Wisconsin Card Sorting test, number of errors [6]
- Phonemic fluency, number of correct words [7]

3) Language

- Boston Naming Test, number of correct words [8]
- Similarities, correct answers [5]

4) Memory

- California Verbal learning Test, Long-delay free recall [9]
- California Verbal learning Test, Recognition-discriminability (Delis et al., 1987)

5) Visuo-spatial

- Block Design Test [5]
- Rey-Osterrieth Complex Figure, Copy [10]

## References

1 Litvan I, Goldman JG, Tröster AI, Schmand BA, Weintraub D, Petersen RC, et al. Diagnostic criteria for mild cognitive impairment in Parkinson’s disease: Movement Disorder Society Task Force guidelines. Mov Disord. 2012 Mar;27(3):349–56.

2 Ehrensperger MM, Berres M, Taylor KI, Monsch AU. Screening properties of the German IQCODE with a two-year time frame in MCI and early Alzheimer’s disease. Int Psychogeriatr IPA. 2010 Feb;22(1):91–100.

3 Stroop JR. Studies of interference in serial verbal reactions. J Exp Psychol. 1935 Dec;18(6):643–62.

4 Reitan RM. VALIDITY OF THE TRAIL MAKING TEST AS AN INDICATOR OF ORGANIC BRAIN DAMAGE. Percept Mot Skills. 1958 Dec;8(3):271–6.

5 Härtig C, Markowitsch HJ, Neufeld H, Calabrese P, Deisinger K, Kessler J. Wechsler Gedächtnis Test - Revisierte Fassung. 2000

6 Nelson HE. A Modified Card Sorting Test Sensitive to Frontal Lobe Defects. Cortex. 1976 Dec;12(4):313–24.

7 Thurstone L. Primary mental abilities. Science. 1948 Nov;108(2813):585.

8 Morris JC, Heyman A, Mohs RC, Hughes JP, van Belle G, Fillenbaum G, et al. The Consortium to Establish a Registry for Alzheimer’s Disease (CERAD). Part I. Clinical and neuropsychological assessment of Alzheimer’s disease. Neurology. 1989 Sep;39(9):1159–65.

9 Delis D, Kramer J, Ober B, Kaplan E. The California Verbal Learning Test: Administration and interpretation. San Antonio, TX: Psychological Corporation; 1987.

10 Duley JF, Wilkins JW, Hamby SL, Hopkins DG, Burwell RD, Barry NS. Explicit scoring criteria for the Rey-Osterrieth and Taylor complex figures. Clin Neuropsychol. 1993 Jan;7(1):29–38.

L**egend of figures**

**Fig. 1.** Serial position effects of the CVLT on Trial 2-5 in Normal Controls (NC), cognitively normal Parkinson’s disease (PD) patients (PD-CN), patients with MCI due to PD (PD-MCI) and patients with MCI due to Alzheimer's disease (AD-MCI).
